# Supplementary material
Source: Springer Nature journal article supplement (https://www.springermedizin.de/resource/supplementary/13099_2010_42_MOESM2_ESM.pdf/9665388)

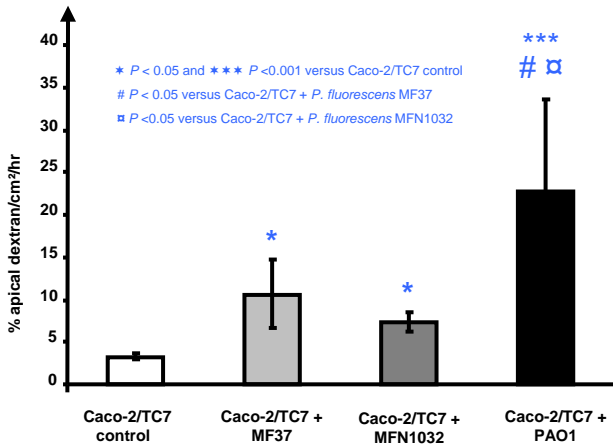

Supplement: MOESM2 [file 9665388]
